# Supplementary material for: Host and viral determinants for efficient SARS-CoV-2 infection of the human lung
Source: Nat Commun. 2021 Jan 8;12:134. doi: 10.1038/s41467-020-20457-w (PMC7794309; doi:10.1038/s41467-020-20457-w)
Supplement: Supplementary file 1 — Supplementary Information [file 41467_2020_20457_MOESM1_ESM.pdf]

## Host and viral determinants for efficient SARS-CoV-2 infection of the human lung

Hin Chu<sup>1,2,\*</sup>, Bingjie Hu<sup>2,\*</sup>, Xiner Huang<sup>2,\*</sup>, Yue Chai<sup>2,\*</sup>, Dongyan Zhou<sup>2</sup>, Yixin Wang<sup>2</sup>,  
Huiping Shuai<sup>2</sup>, Dong Yang<sup>2</sup>, Yuxin Hou<sup>2</sup>, Xi Zhang<sup>2</sup>, Terrence Tsz-Tai Yuen<sup>2</sup>, Jian-Piao Cai<sup>2</sup>,  
Anna Jinxia Zhang<sup>1,2</sup>, Jie Zhou<sup>1,2</sup>, Shuofeng Yuan<sup>1,2</sup>, Kelvin Kai-Wang To<sup>1,2,3,4</sup>, Ivy Hau-Yee  
Chan<sup>5</sup>, Ko-Yung Sit<sup>5</sup>, Dominic Chi-Chung Foo<sup>5</sup>, Ian Yu-Hong Wong<sup>5</sup>, Ada Tsui-Lin Ng<sup>5</sup>, Tan  
To Cheung<sup>5</sup>, Simon Ying-Kit Law<sup>5</sup>, Wing-Kuk Au<sup>5</sup>, Melinda A. Brindley<sup>6</sup>, Zhiwei Chen<sup>1,2,3</sup>,  
Kin-Hang Kok<sup>1,2,3</sup>, Jasper Fuk-Woo Chan<sup>1,2,3,4,#</sup>, Kwok-Yung Yuen<sup>1,2,3,4,#</sup>

Supplementary Figure and Figure legends 1-7

Supplementary Table 1

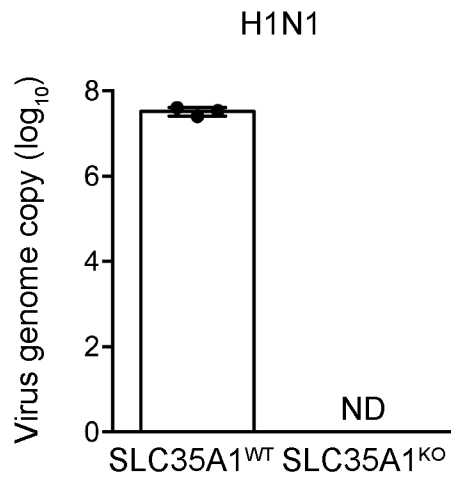

**Supplementary Figure 1. Solute carrier family 35 member A1 (SLC35A1) knockout**

**HEK293 cells are resistant to influenza virus infection.** The SLC35A1<sup>WT</sup> and SLC35A1<sup>KO</sup> HEK293 cells were infected with H1N1 at 0.1MOI for 1h at 37 °C. Cell lysates were collected at 24hpi and lysed for qRT-PCR analysis (n=3). Data represented mean and standard deviations from the indicated number of biological repeats. Source data are provided as a Source Data file.

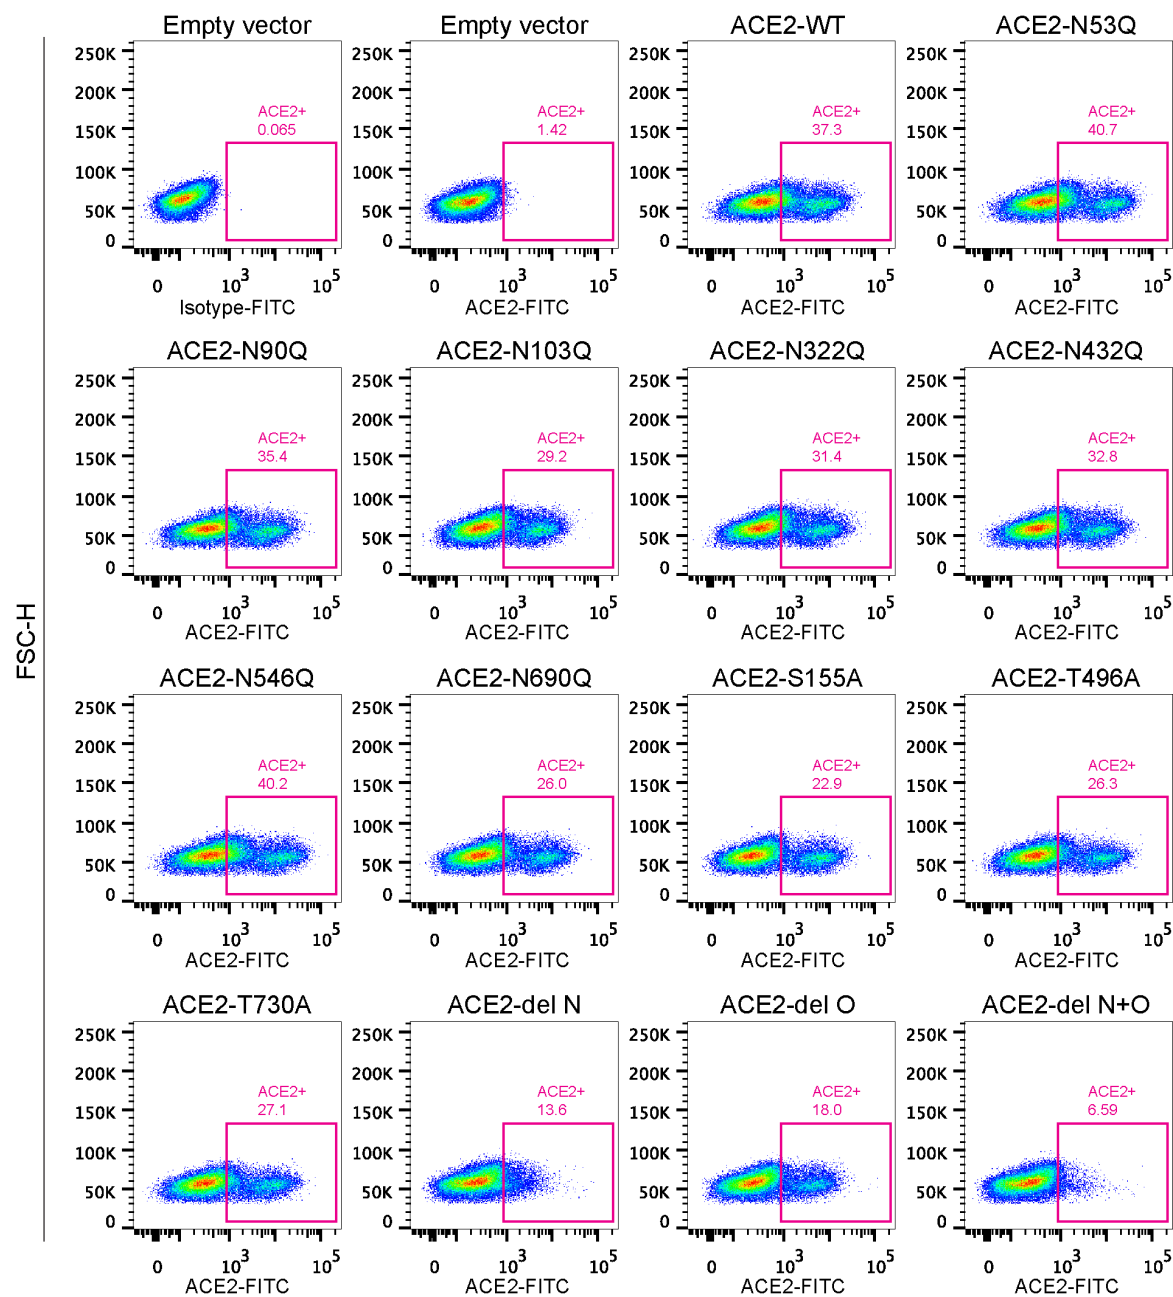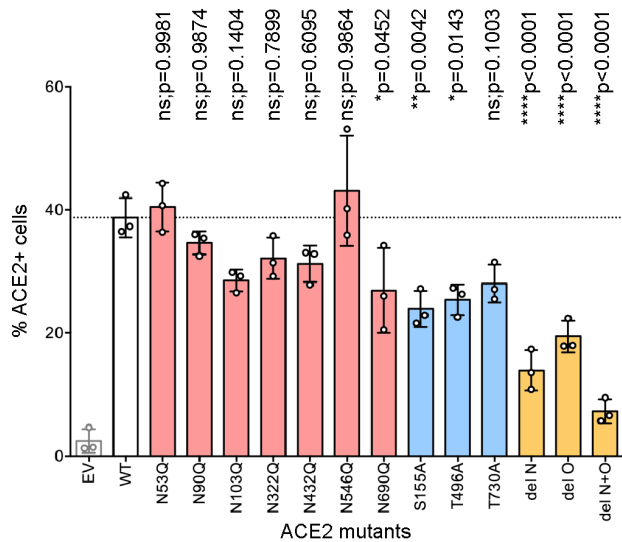

**Supplementary Figure 2. Cell surface expression of the ACE2 glycosylation mutants.**

BHK21 cells were transfected with the ACE2 glycosylation mutants. At 24 hours post transfection, the cells were harvested for flow cytometry analysis of cell surface ACE2 expression (n=3). Data represented mean and standard deviations from the indicated number of biological repeats. Statistical analysis was performed with one-way ANOVA. \* represented  $p < 0.05$ , \*\* represented  $p < 0.01$ , \*\*\*\* represented  $p < 0.0001$ . ns = not significant. Source data are provided as a Source Data file.

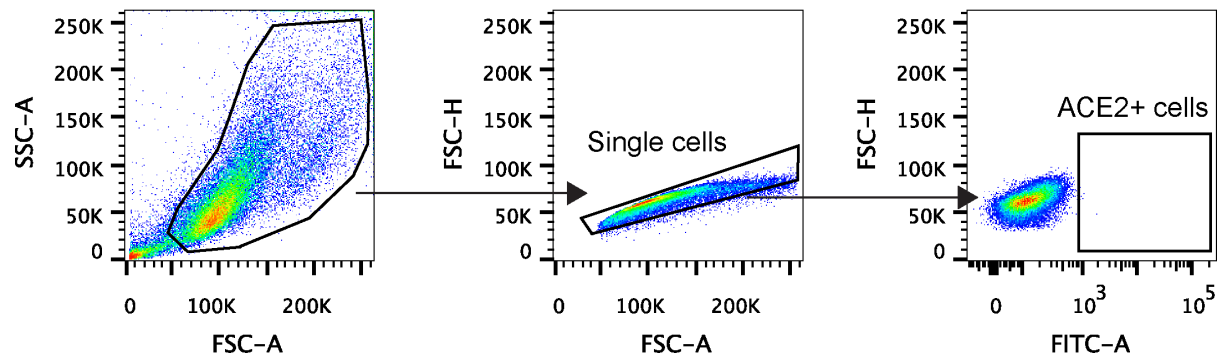

**Supplementary Figure 3. Gating strategy for the flow cytometry panels presented in**

**Figure S2.** The main BHK21 cell population was gated with SSC-A vs FSC-A. The selected cells were gated with FSC-H vs FSC-A for single cells. From that, ACE2 positive cells were gated with FSC-H vs FITC-A. BHK21 cells labeled with isotype control and secondary antibody were used as the control for gating.

| Genome                                                | Position    | Nucleotide                                   | Gene  | Amino acid           |
|-------------------------------------------------------|-------------|----------------------------------------------|-------|----------------------|
| SARS-CoV-2 HKU001a                                    | 802         | (GGG)                                        | NSP2  | G179                 |
| SARS-CoV-2 HKU001a S <sub>1</sub> /S <sub>2</sub> mut | 802         | (GGA)                                        | NSP2  | G179                 |
| SARS-CoV-2 HKU001a                                    | 5947        | (CCC)                                        | NSP3  | P1076                |
| SARS-CoV-2 HKU001a S <sub>1</sub> /S <sub>2</sub> mut | 5947        | (CCT)                                        | NSP3  | P1076                |
| SARS-CoV-2 HKU001a                                    | 11074       | (TTT)                                        | NSP6  | F34                  |
| SARS-CoV-2 HKU001a S <sub>1</sub> /S <sub>2</sub> mut | 11074       | (TTT)                                        | NSP6  | F34                  |
| SARS-CoV-2 HKU001a                                    | 18314       | (GAG)                                        | NSP14 | E92                  |
| SARS-CoV-2 HKU001a S <sub>1</sub> /S <sub>2</sub> mut | 18314       | (GGG)                                        | NSP14 | G92                  |
| SARS-CoV-2 HKU001a                                    | 23597-23626 | (AAT TCT CCT CGG CGG<br>GCA CGT AGT GTA GCT) | S     | NSPRRARSVA (688-697) |
| SARS-CoV-2 HKU001a S <sub>1</sub> /S <sub>2</sub> mut | 23597-23626 | (Deletion)                                   | S     | Deletion (688-697)   |
| SARS-CoV-2 HKU001a                                    | 29051       | (CAA)                                        | N     | Q260                 |
| SARS-CoV-2 HKU001a S <sub>1</sub> /S <sub>2</sub> mut | 29051       | (GAA)                                        | N     | E260                 |
| SARS-CoV-2 HKU001a                                    | 29386       | (GAA)                                        | N     | E371                 |
| SARS-CoV-2 HKU001a S <sub>1</sub> /S <sub>2</sub> mut | 29386       | (GAC)                                        | N     | D371                 |

**Supplementary Figure 4. Sequence alignment between SARS-CoV-2 HKU-001a and SARS-CoV-2 HKU001a S<sub>1</sub>/S<sub>2</sub>mut.** The nucleotide and amino acid sequences of SARS-CoV-2 HKU001a (MT230904) and SARS-CoV-2 HKU001a S<sub>1</sub>/S<sub>2</sub>mut (MT621560) were compared. Amino acid substitutions of the culture strain were labeled in red.

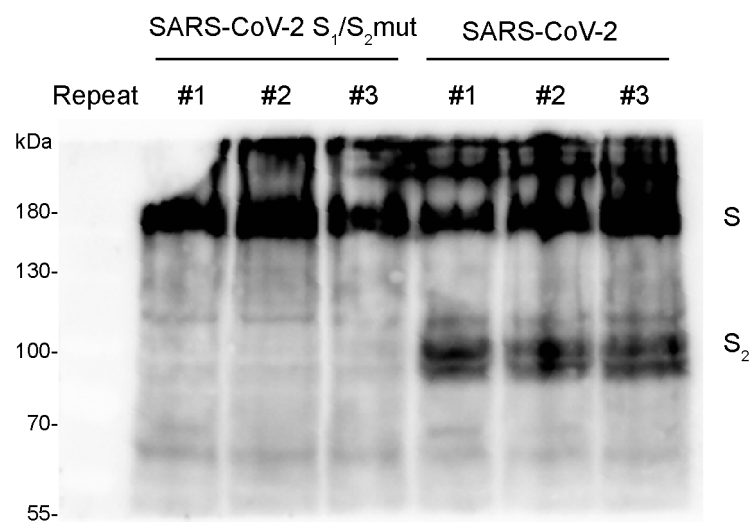

**Supplementary Figure 5. Cleavage of SARS-CoV-2 spike and SARS-CoV-2 S<sub>1</sub>/S<sub>2</sub>mut**

**spike.** VeroE6 cells were infected with SARS-CoV-2 or SARS-CoV-2 S<sub>1</sub>/S<sub>2</sub>mut. At 24 hours, the cell lysates were lysed for Western blot analysis of spike cleavage. Three biological repeats for each virus were shown. Source data are provided as a Source Data file.

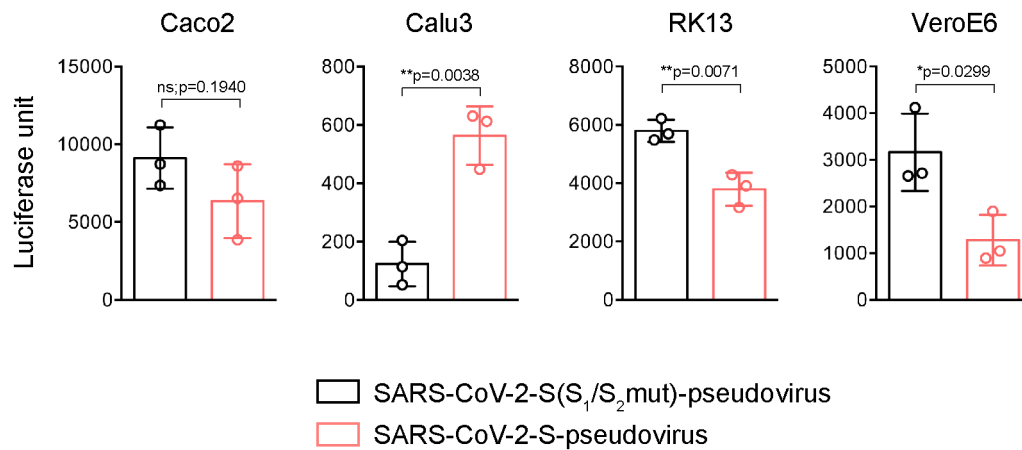

**Supplementary Figure 6. SARS-CoV-2-S-pseudovirus or SARS-CoV-2-S(S<sub>1</sub>/S<sub>2</sub>mut)-pseudovirus entry in Caco2, Calu3, RK13, and VeroE6 cells.** Caco2, Calu3, RK13, and VeroE6 cells were inoculated with SARS-CoV-2-S-pseudoviruses or SARS-CoV-2-S(S<sub>1</sub>/S<sub>2</sub>mut)-pseudoviruses. At 24 hours post inoculation, the cells were harvested and pseudovirus entry was determined by measuring the luciferase signal (n=3). Data represented mean and standard deviations from the indicated number of biological repeats. Statistical significance between groups was determined with two-sided unpaired Student's t-test. \* represented  $p < 0.05$ , \*\* represented  $p < 0.01$ . ns = not significant. Source data are provided as a Source Data file.

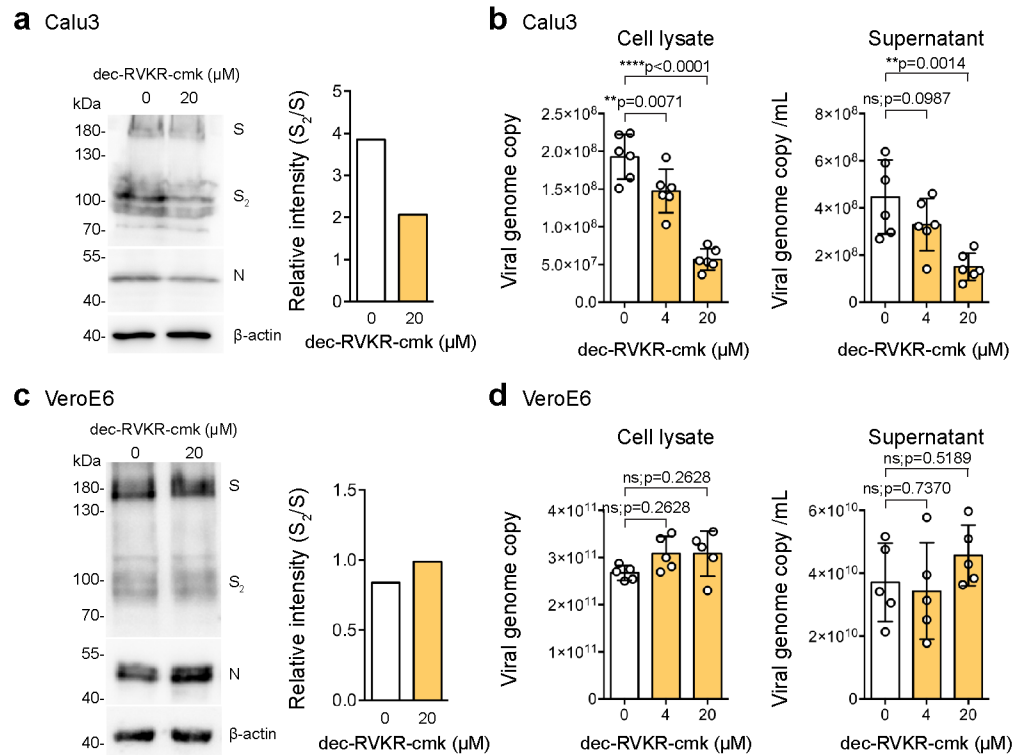

### Supplementary Figure 7. Differential role of furin in Calu3 and VeroE6 cells during

**SARS-CoV-2 infection.** **a** Calu3 cells were infected with SARS-CoV-2 with or without 20 $\mu\text{M}$  dec-RVKR-cmk. Spike cleavage was visualized with Western blots. **b** Calu3 cells were infected with SARS-CoV-2 with 0, 4, or 20 $\mu\text{M}$  dec-RVKR-cmk. Cell lysate and supernatant samples were harvested at 24hpi for qRT-PCR analysis of virus replication ( $n=6$ ). **c** VeroE6 cells were infected with SARS-CoV-2 with or without 20 $\mu\text{M}$  dec-RVKR-cmk. Spike cleavage was visualized with Western blots. **d** VeroE6 cells were infected with SARS-CoV-2 with 0, 4, or 20 $\mu\text{M}$  dec-RVKR-cmk. Cell lysate and supernatant samples were harvested at 24hpi for qRT-PCR analysis of virus replication ( $n=5$ ). Data represented mean and standard deviations from the indicated number of biological repeats. The experiment in **a** and **c** was repeated three times independently with similar results. Statistical significance between groups was determined with one-way ANOVA. \*\* represented  $p < 0.01$ , \*\*\*\* represented  $p < 0.0001$ . ns = not significant. Source data are provided as a Source Data file.

**Supplementary Table 1. Primer list.**

| Species    | Gene        | Sequence                                                                                                                                      |
|------------|-------------|-----------------------------------------------------------------------------------------------------------------------------------------------|
| SARS-CoV-2 | RdRp        | Forward 5'- CGCATACAGTCTTRCAGGCT -3'<br>Reverse 5'- GTGTGATGTTGAWATGACATGGTC -3'<br>Probe 5'- FAM-TTAAGATGTGGTGCTTGCATACGTAGAC-IABkFQ -3'     |
| SARS-CoV   | RdRp        | Forward 5'- CGCATACAGTCTTRCAGGCT -3'<br>Reverse 5'- GTGTGATGTTGAWATGACATGGTC -3'<br>Probe 5'-Cy5-CTTCGTTGCGGTGCCTGTATTAGG-IAbRQSp-3'          |
| MERS-CoV   | N           | Forward 5'- CAAAACCTTCCCTAAGAAGGAAAAG -3'<br>Reverse 5'- GCTCCTTTGGAGGTTTCAGACAT -3'<br>Probe 5'-FAM-ACAAAAGGCACCAAAAGAAGAATCAACAGACC-BHQ1-3' |
| Human      | ACE2        | Forward 5'- CATTGGAGCAAGTGTGGATCTT -3'<br>Reverse 5'- GAGCTAATGCATGCCATTCTCA -3'                                                              |
|            | GAPDH       | Forward 5'- ATTCCACCCATGGCAAATTC -3'<br>Reverse 5'- CGCTCCTGGAAGATGGTGAT -3'                                                                  |
|            | TMPRSS2     | Forward 5'- CTCTACGGACCAAACTTCATC -3'<br>Reverse 5'- CCACTATTCCTTGGCTAGAGTA -3'                                                               |
|            | Furin       | Forward 5'- CCTGGTTGCTATGGGTGGTAG -3'<br>Reverse 5'- AAGTGGTAATAGTCCCCGAAGA -3'                                                               |
|            | Cathepsin L | Forward 5'- GTGGACATCCCTAAGCAGGA -3'<br>Reverse 5'- CACAATGGTTTCTCCGGTC -3'                                                                   |
|            | Cathepsin B | Forward 5'- AGAGTTATGTTTACCGAGGACCT -3'<br>Reverse 5'- GATGCAGATCCGGTCAGAGA -3'                                                               |
